# Supplementary material
Source: PubMed Central journal article supplement (PMC3433093)
Supplement: supp_blood-2012-04-423715_blood-2012-04-423715-1.pdf [file supp_blood-2012-04-423715_blood-2012-04-423715-1.pdf]

**Table 1. siRNA Sequences**

|                    | Sequence 5' to 3'               |
|--------------------|---------------------------------|
| <b>LUC-S</b>       | <b>cuuAcGcuGAGuAcuucGAdTsdT</b> |
| <b>LUC-AS</b>      | <b>UCGAAGuACUcAGCGuAAGdTsdT</b> |
| <b>mEGLN1-S</b>    | <b>cAAGGuAcGcAAuAAcuGudTsdT</b> |
| <b>mEGLN1-AS</b>   | <b>AcAGUuAUUGCGuACCUUGdTsdT</b> |
| <b>m/rEGLN2-S</b>  | <b>AGAcAAGuAucAGcuAGcAdTsdT</b> |
| <b>m/rEGLN2-AS</b> | <b>UGCuAGCUGAuACUUGUCUdTsdT</b> |
| <b>m/rEGLN3-S</b>  | <b>GuAGuAAcAGuuccGGAAAdTsdT</b> |
| <b>m/rEGLN3-AS</b> | <b>UUUCCGGAACUGUuACuACdTsdT</b> |
| <b>rEGLN1-S</b>    | <b>cGccAcAAGGuAcGcAAuAdTsdT</b> |
| <b>rEGLN1-AS</b>   | <b>uAUUGCGuACCUUGUGGCGdTsdT</b> |
| <b>GFP-S</b>       | <b>AcAuGAAGcAGcACGACuUdTsdT</b> |
| <b>GFP-AS</b>      | <b>AAGUCGUGCUGCUUCAUGUdTsdT</b> |

Lowercase base=2'OMe, s=phosphorothioate, m=mouse, r=rat

**Table 2. 5'RACE**

**primers**

|                             | <b>Sequence 5' to 3'</b>                   |
|-----------------------------|--------------------------------------------|
| <b>Adaptor oligo</b>        | <b>CGACTGGAGCACGAGGACACTGACATGG</b>        |
| <b>Nested adaptor oligo</b> | <b>GGACACTGACATGGACTGAAGGAGTAG</b>         |
| <b>EGLN1 GSP</b>            | <b>AGAGATGAAATGAACTCAGTTAGGTGACAGGTCTG</b> |
| <b>EGLN1 PCR Round 1</b>    | <b>TTGTTTCGTGTCCAGATGGAAAAGCTACTCTCCTC</b> |
| <b>EGLN1 PCR Round 2</b>    | <b>GGCTTGAGTTCAACCCTCACACCTTTCTCACCTG</b>  |
| <b>EGLN2 GSP</b>            | <b>TATTTCTTGGCTGGCAGAACCTCCATAC</b>        |
| <b>EGLN2 PCR Round 1</b>    | <b>CAGACAGTGGCAGCCAGTCCATACACTG</b>        |
| <b>EGLN2 PCR Round 2</b>    | <b>CAGCAGAGGTCTCTCCTTGTTGCTCCTCAGTG</b>    |
| <b>EGLN3 GSP</b>            | <b>GATGTGGAAGAACTCCAATAGCTCTGAGGTC</b>     |
| <b>EGLN3 PCR Round 1</b>    | <b>CAGTGCTGAATTACCAGGAAGCTTTCTATCCTCTG</b> |
| <b>EGLN3 PCR Round 2</b>    | <b>GCAAGAAAACATGAAGTACCACAAACAAG</b>       |

## Supplemental Figure 1

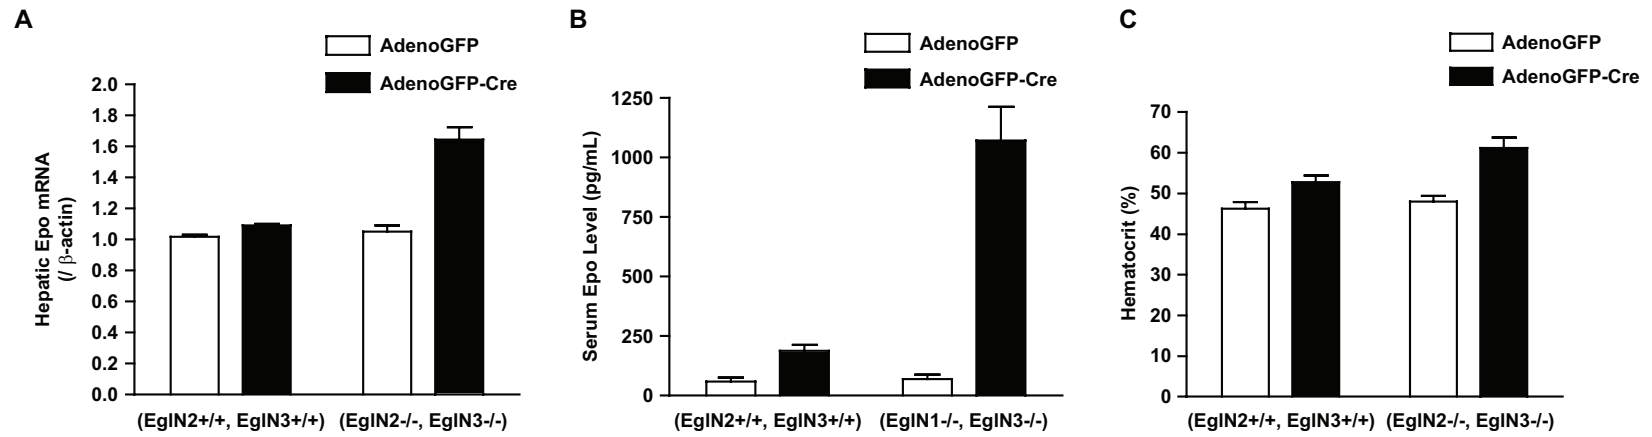

**Supplemental Figure 1.** Control of hepatic EPO production by EglN1 and its paralogs. Hepatic mRNA, serum EPO, and Hematocrit values in *EglN1*<sup>f/f</sup> mice with the indicated *EglN2* and *EglN3* genotypes two weeks after receiving adenoviruses encoding a GFP-Cre fusion protein or GFP alone by tail vein injection.

Supplemental Figure 2

A

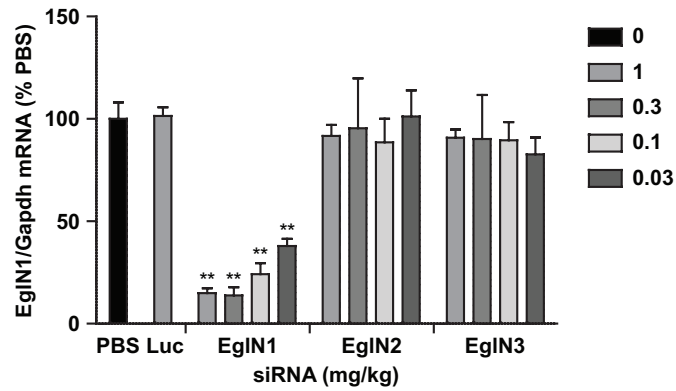

B

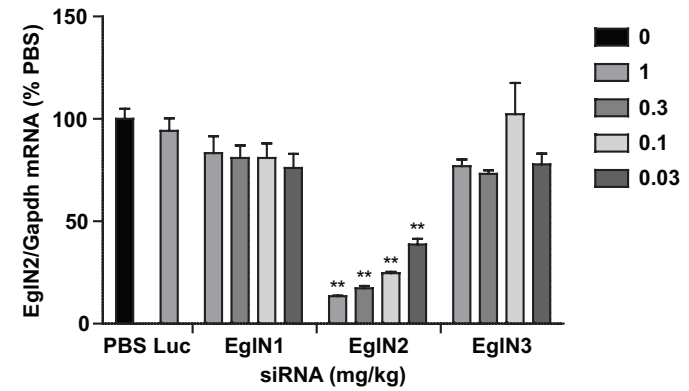

C

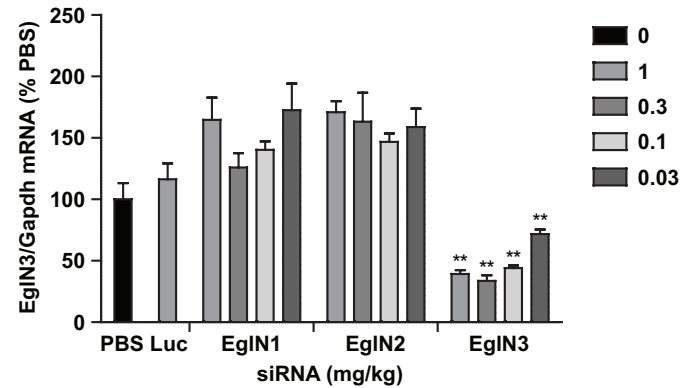

**Supplemental Figure 2. Validation of EglN siRNAs.** *EglN1*, *EglN2*, and *EglN3* hepatic mRNA levels in mice 72 hours after receiving increasing amounts of LNPs containing the indicated siRNAs by tail vein injection (0.03, 0.1, 0.3, or 1 mg/kg). LUC = firefly luciferase. mRNA levels were normalized to GAPDH and then to the corresponding value for PBS-treated mice. n=3. Error Bars represent 1 std. dev. \*\*P<0.01.

### Supplemental Figure 3

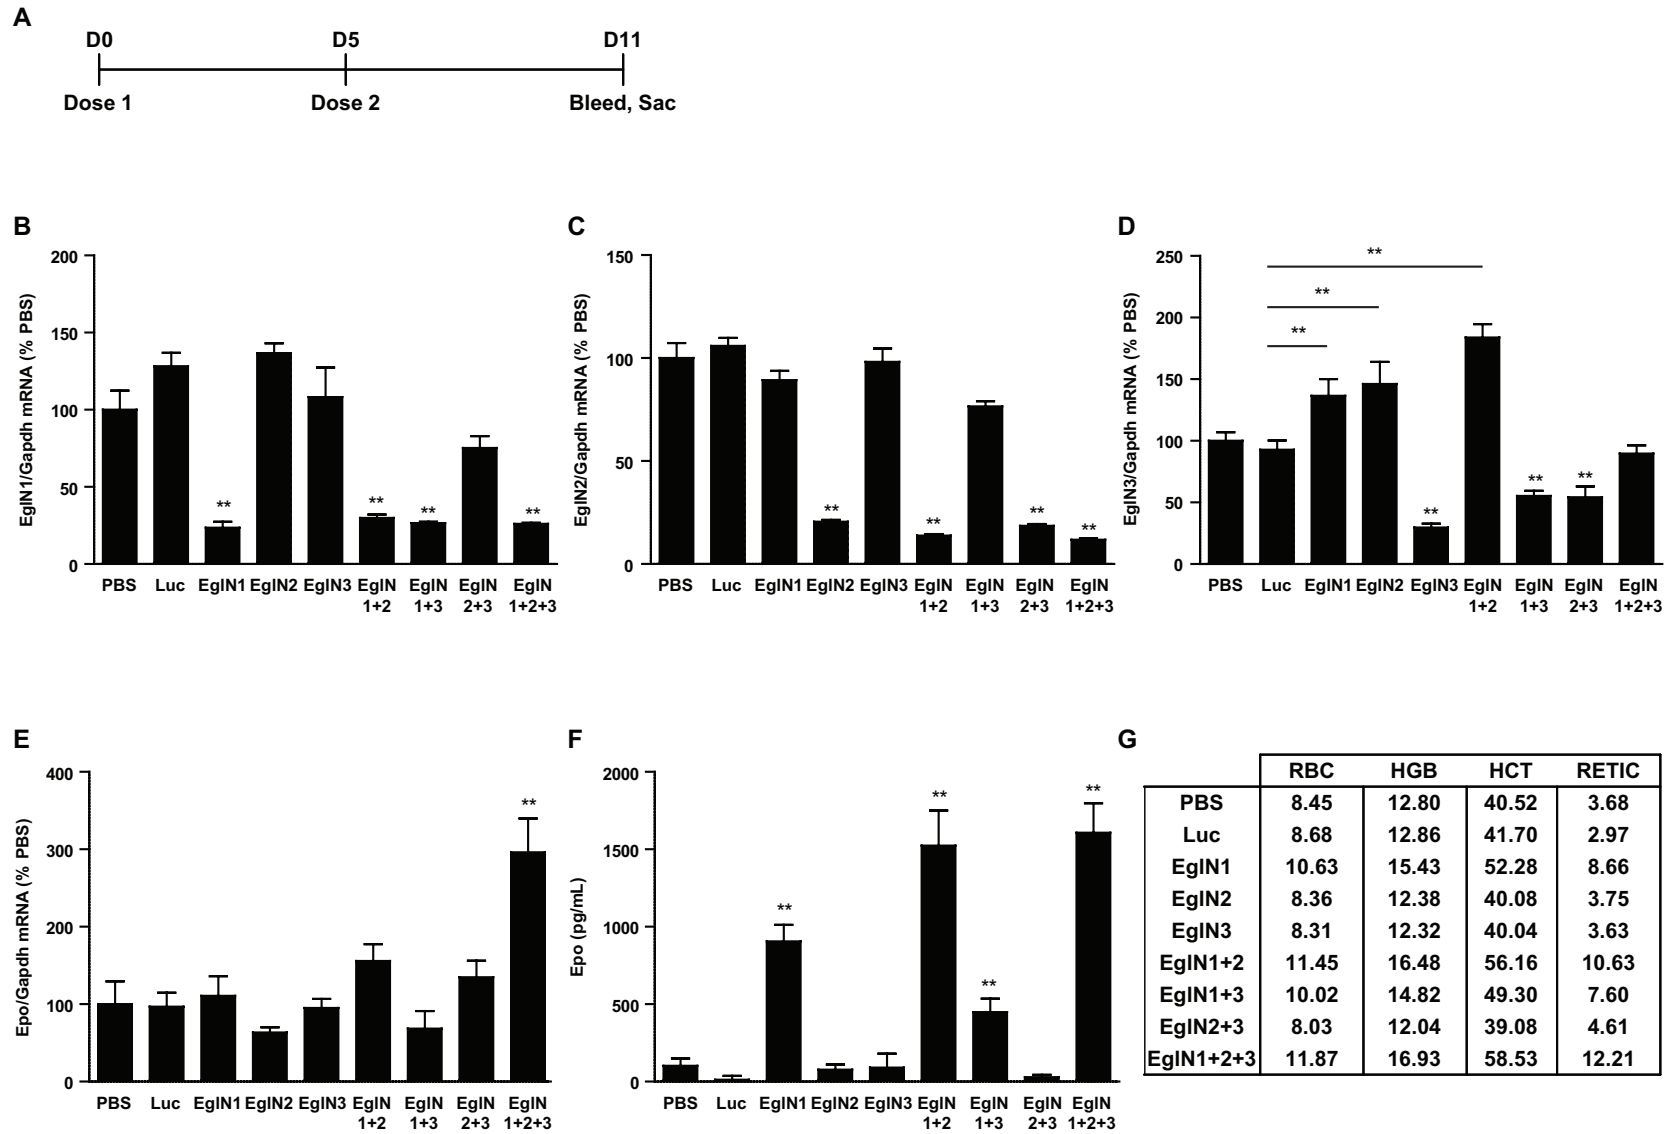

**Supplemental Figure 3. Combinatorial effects of EglN siRNAs on hepatic EPO production.** (A) Dosing Schema. (B-E). Hepatic *EglN* (B-D) and *EPO* (E) mRNA levels for mice treated with combinations of siRNA nanoparticles targeting the indicated *EglN* family members (0.5 mg/kg per *EglN* family member). mRNA levels were normalized to GAPDH and then to the corresponding value for PBS-treated mice. (F and G). Serum EPO (F) and hematologic (G) values for mice treated as above. n=3. Error Bars represent 1 std. dev. \*\*P<0.01

## Supplemental Figure 4

A

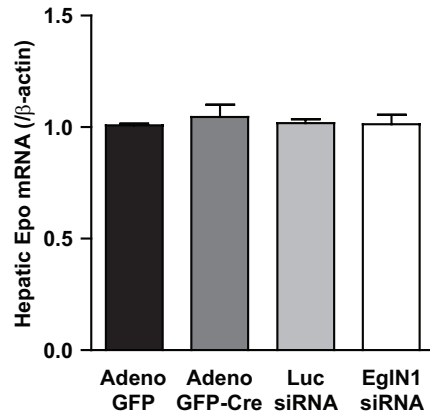

B

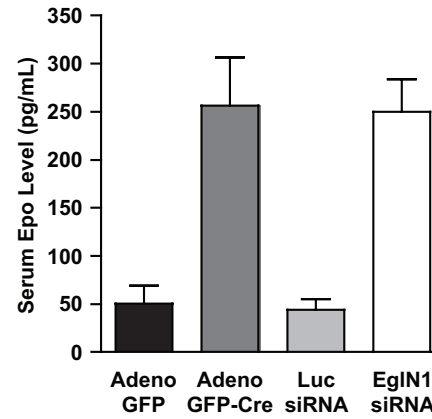

C

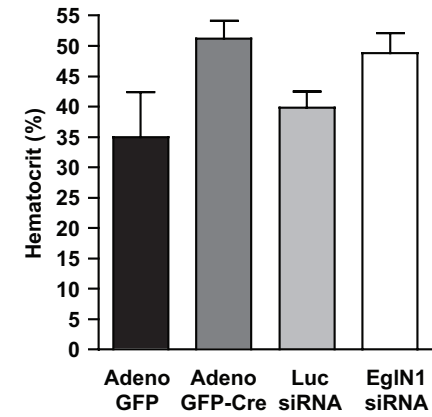

**Supplemental Figure 4. Acute inactivation of EgIN1 with either Cre Recombinase or siRNA induces erythropoiesis.** Hepatic EPO mRNA, serum EPO, and Hematocrit values in *Egln1 f/f*; *Egln2 +/+*; *Egln3 +/+* mice two weeks after receiving either an adenovirus encoding a GFP-Cre fusion protein (or GFP alone) or one dose of EgIN1 siRNA LNP (or luciferase siRNA LNP) (1 mg/kg) by tail vein injection. Error bars represent 1 std. dev.

## Supplemental Figure 5

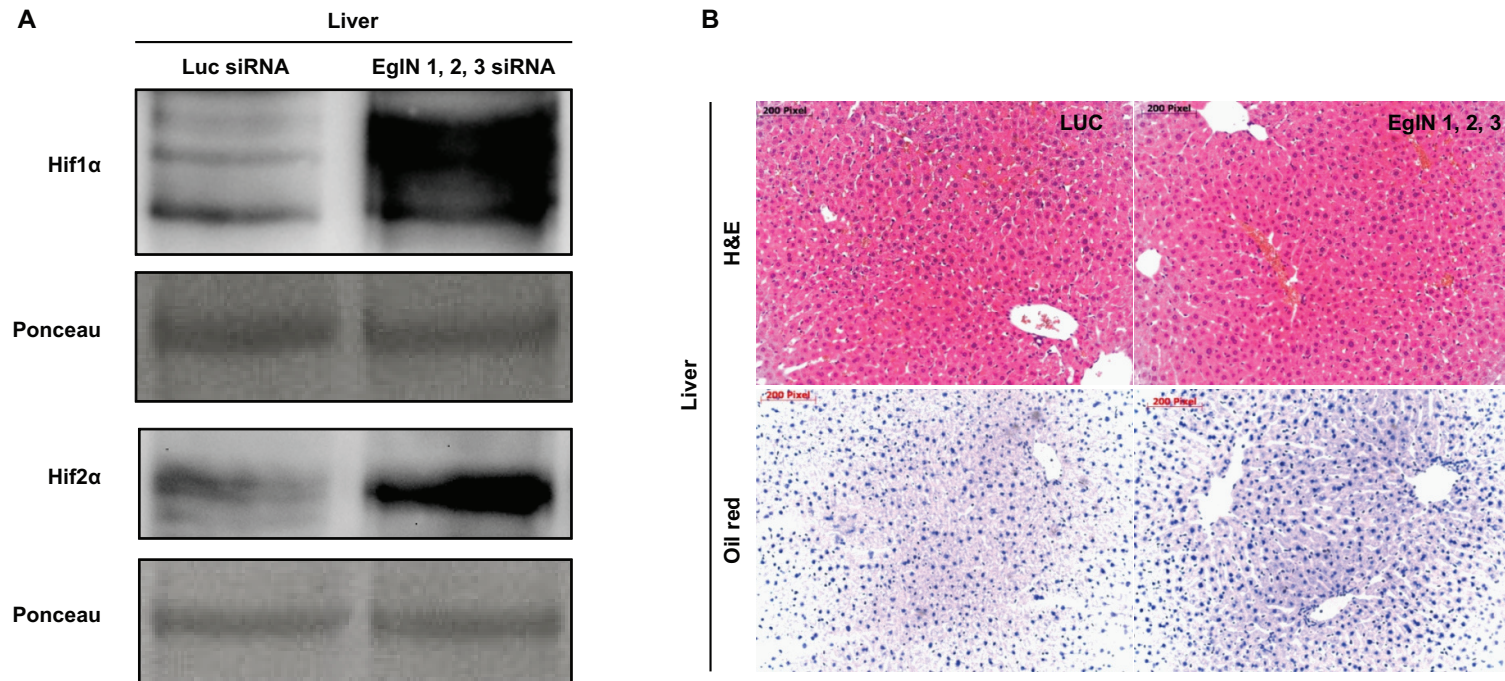

**Supplemental Figure 5. Four weeks of EgIN mRNA suppression with LNPs does not result in fatty liver or histological abnormalities.** (A). Immunoblot analysis of liver extracts prepared from mice (day 9) that received two doses (day 0 and day 4) of LNPs targeting EgIN1+EgIN2+EgIN3 or luciferase (1 mg/kg siRNA/dose). (B) Hematoxylin and Eosin staining (top) and oil red staining (bottom) of liver tissue sections from mice treated with 4 weekly doses (1.5 mg/kg siRNA) of LNPs targeting EgIN1+EgIN2+EgIN3(0.5 mg/kg each)(right) or luciferase (left).

## Supplemental Figure 6

A

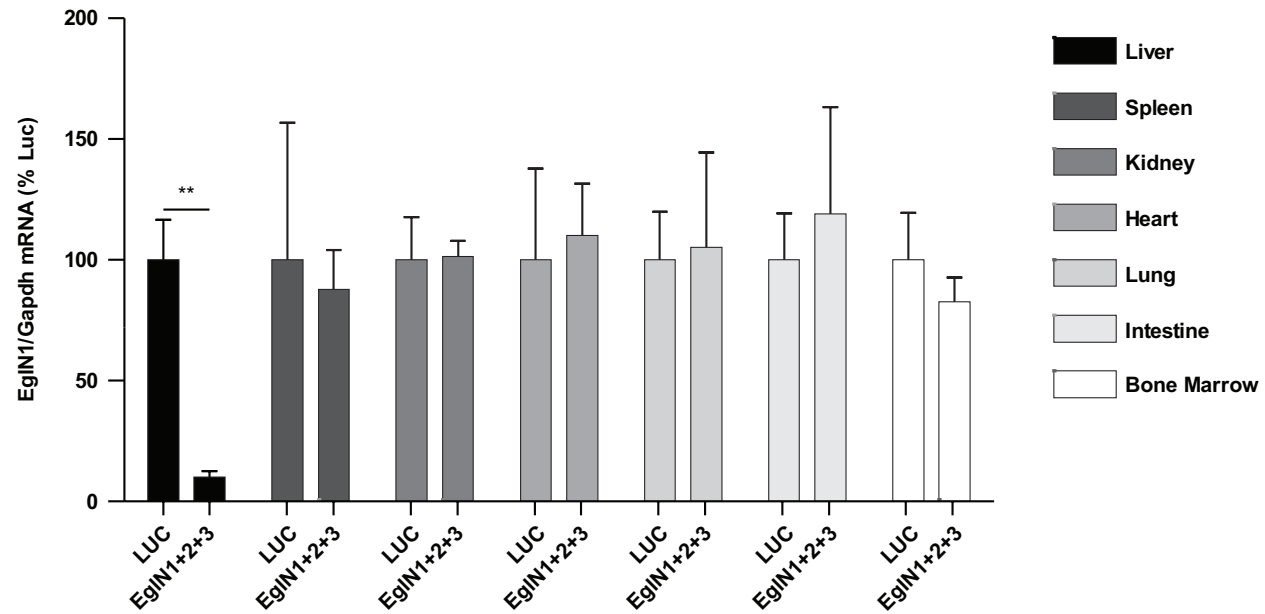

**Supplemental Figure 6. Egin mRNA silencing in different tissues.** *Egin1* mRNA levels in various mouse tissues 48 hours after receiving LNPs containing Egin or LUC control siRNAs by tail vein injection at 1 mg/kg dose. LUC = firefly luciferase. mRNA levels were normalized to GAPDH and then to the corresponding value for LUC-treated mice. n=3. Error Bars represent 1 std. dev. \*\*P<0.01.



## Supplemental Figure 7

A

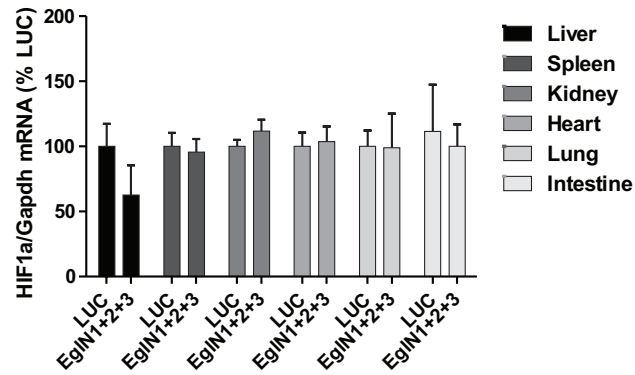

B

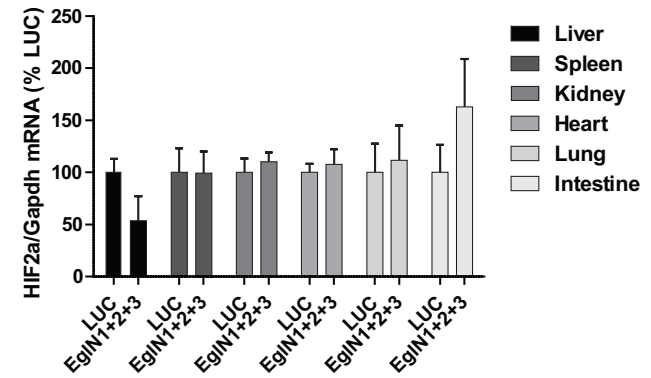

**Supplemental Figure 7. HIF mRNA changes in different tissues after EGIN mRNA knockdown.** HIF1 $\alpha$  (A) and HIF2 $\alpha$  (B) mRNA in the indicated tissues of mice treated 48 hours earlier with LNPs containing EGIN or LUC control siRNAs (1mg/kg) by tail vein injection. LUC= firefly luciferase. mRNA levels were normalized to GAPDH and then to the corresponding value for LUC-treated tissue. n=3. Error Bars represent 1 std. dev.

Supplemental Figure 8

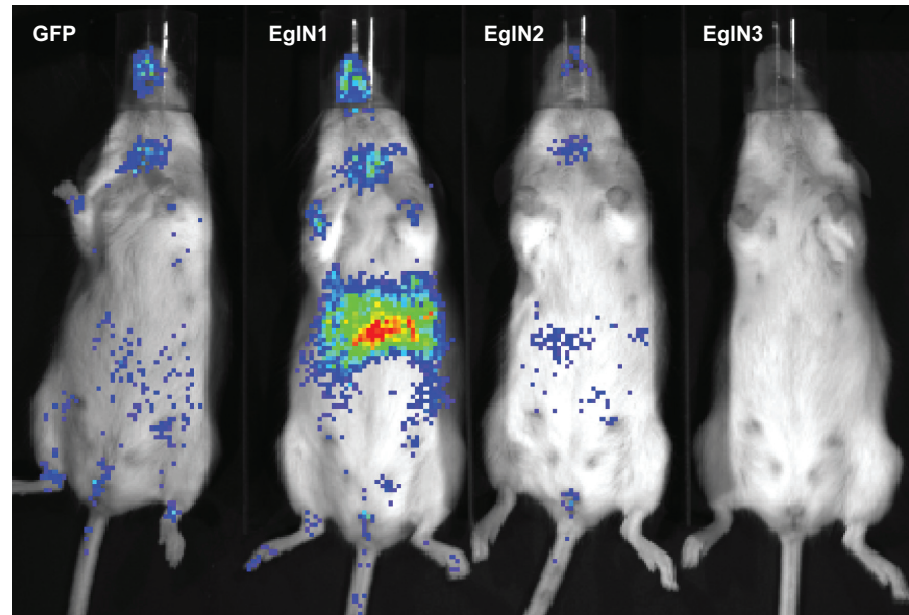

**Supplemental Figure 8. Non-invasive imaging of HIF stabilization after EgIN1 inactivation.** Bioluminescent images of HIF1 $\alpha$ -Luc mice 72 hours after a single intravenous dose of LNPs with siRNA targeting the indicated EgIN family members or, as a negative control, green fluorescent protein (GFP) (1 mg/kg).

## Supplemental Figure 9

A

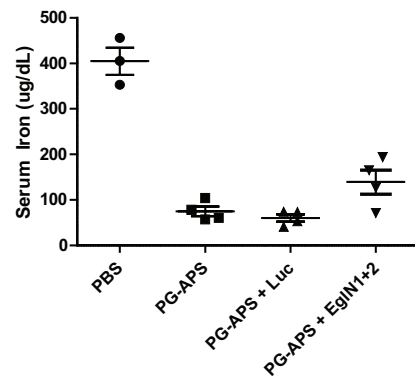

B

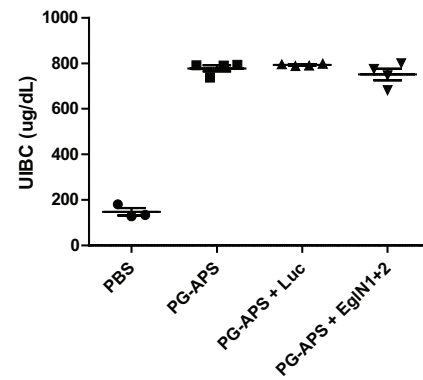

C

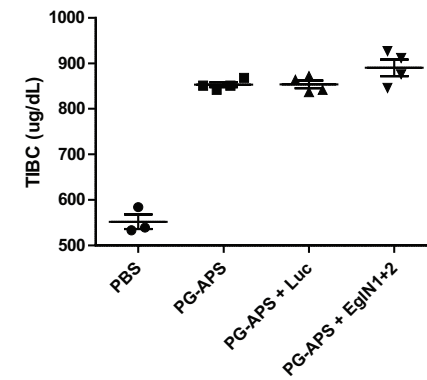

D

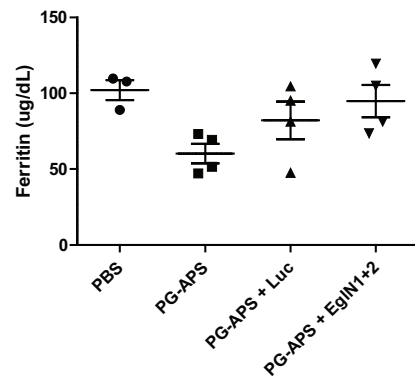

E

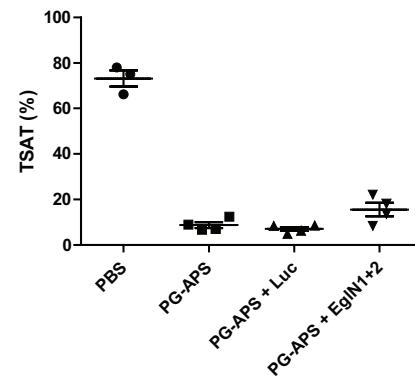

**Supplemental Figure 9. Iron parameters in rat anemia of inflammation model.** Serum iron (A), UIBC (B), TIBC (C), Ferritin (D) and Transferrin saturation (TSAT) (E) at day 37 after 3 weekly 1 mg/kg doses of LNPs targeting Egin1/2 or Luciferase. N=3 (PBS), N=4 (other groups). Error Bars represent 1 std. dev.
